# Supplementary material for: 3D printed fibroblast-loaded hydrogel for scleral remodeling to prevent the progression of myopia
Source: Royal Society of Chemistry journal article supplement (doi:10.1039/d3tb02548a), 2024-01-01
Supplement: d3tb02548a1.pdf [file d3tb02548a1.pdf]

## Supporting Information

### 3D printed fibroblast-loaded hydrogel for scleral remodeling to prevent progression of myopia

Jingwen Hui <sup>1,2,3#</sup>, Xiongfeng Nie <sup>4#</sup>, Pinghui Wei <sup>1,2,3</sup>, Jie Deng <sup>1,2,6</sup>, Yuanzhe Kang <sup>1,2,3</sup>, Kexin Tang<sup>1,2,3</sup>, Guoge Han<sup>1,2,3</sup>, Ling Wang<sup>5</sup>, Wenguang Liu <sup>4</sup>, Quanhong Han <sup>1,2,3\*</sup>

<sup>1</sup>Tianjin Eye Hospital, No.4 Gansu Road, Heping District, Tianjin 300020, China.

<sup>2</sup>Tianjin Key Lab of Ophthalmology and Visual Science, Tianjin, China.

<sup>3</sup>Clinical College of Ophthalmology Tianjin Medical University, Tianjin Medical University, Tianjin, China.

<sup>4</sup>School of Material Science and Engineering, Tianjin Key Laboratory of Composite and Functional Materials, Tianjin University, Tianjin 300350, China.

<sup>5</sup>State Key Laboratory of Medicinal Chemical Biology, College of Pharmacy, Nankai University, Tianjin 300071, China.

<sup>6</sup>School of Medicine, Nankai University, Tianjin, China.

# These authors contributed equally to this work.

\* Corresponding author (E-mail: [hanquanhong126@126.com](mailto:hanquanhong126@126.com))

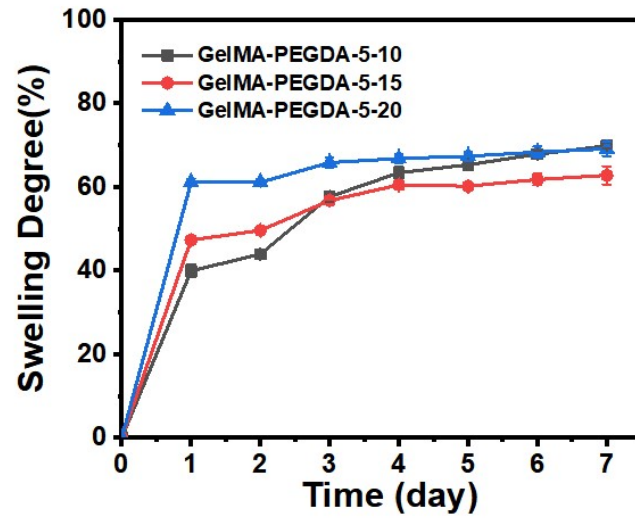

**Fig. S1** The swelling degree of GelMA-PEGDA hydrogels after 7 days incubation in PBS at 37 °C.

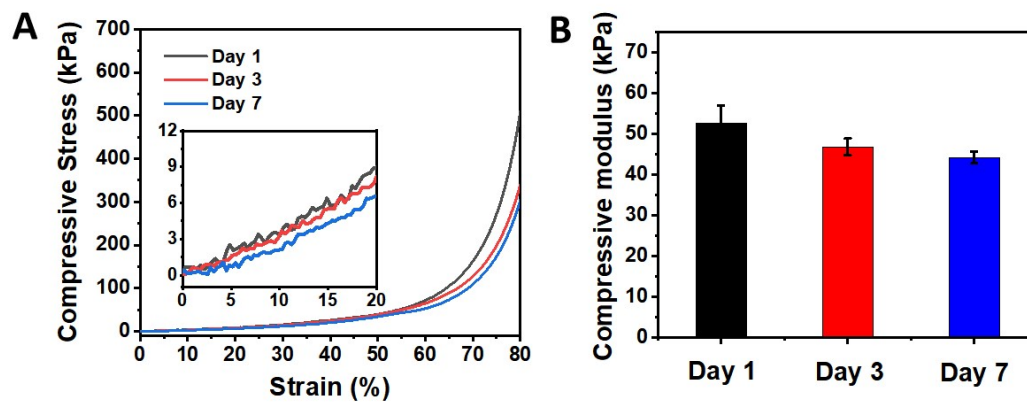

**Fig. S2** (A) Compressive stress-strain curves and (B) compressive modulus of GelMA-PEGDA-5-20 hydrogel in PBS at 37 °C for 1, 3, 7 days.

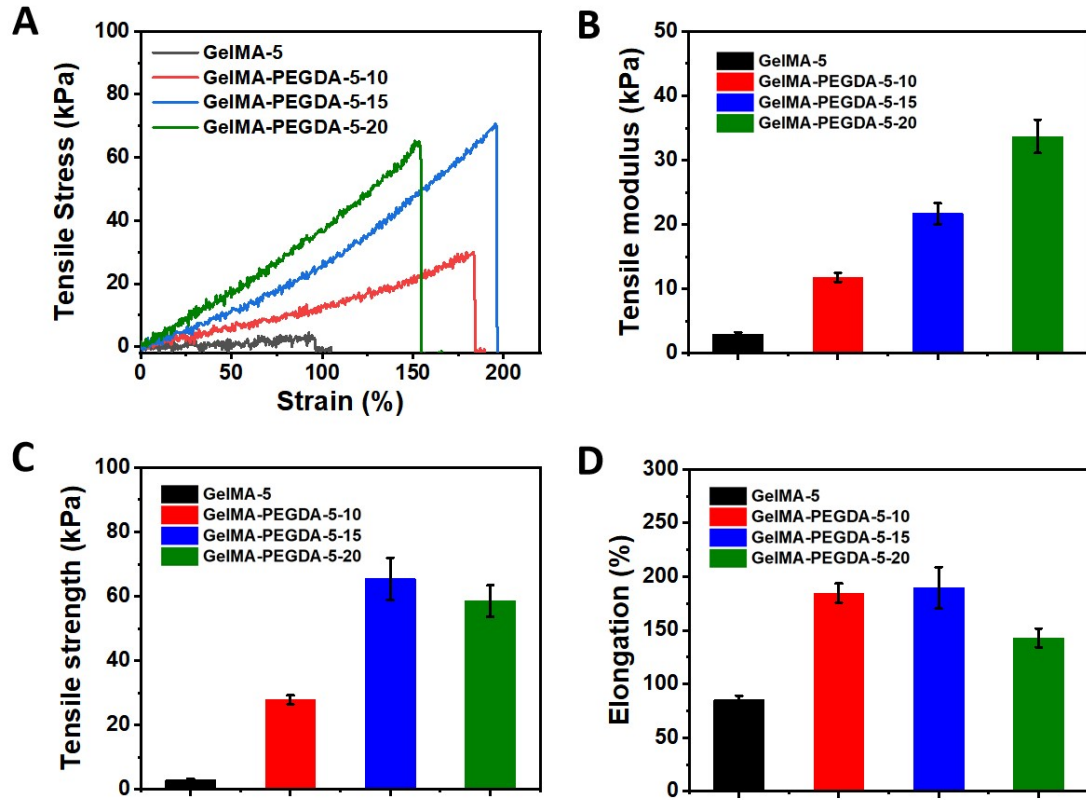

**Fig. S3** (A) Tensile stress-strain curves, (B) tensile modulus, (C) tensile strength and (D) elongation at break of GelMA-PEGDA-5-20 hydrogel after 24-hours swelling in PBS at 37 °C.

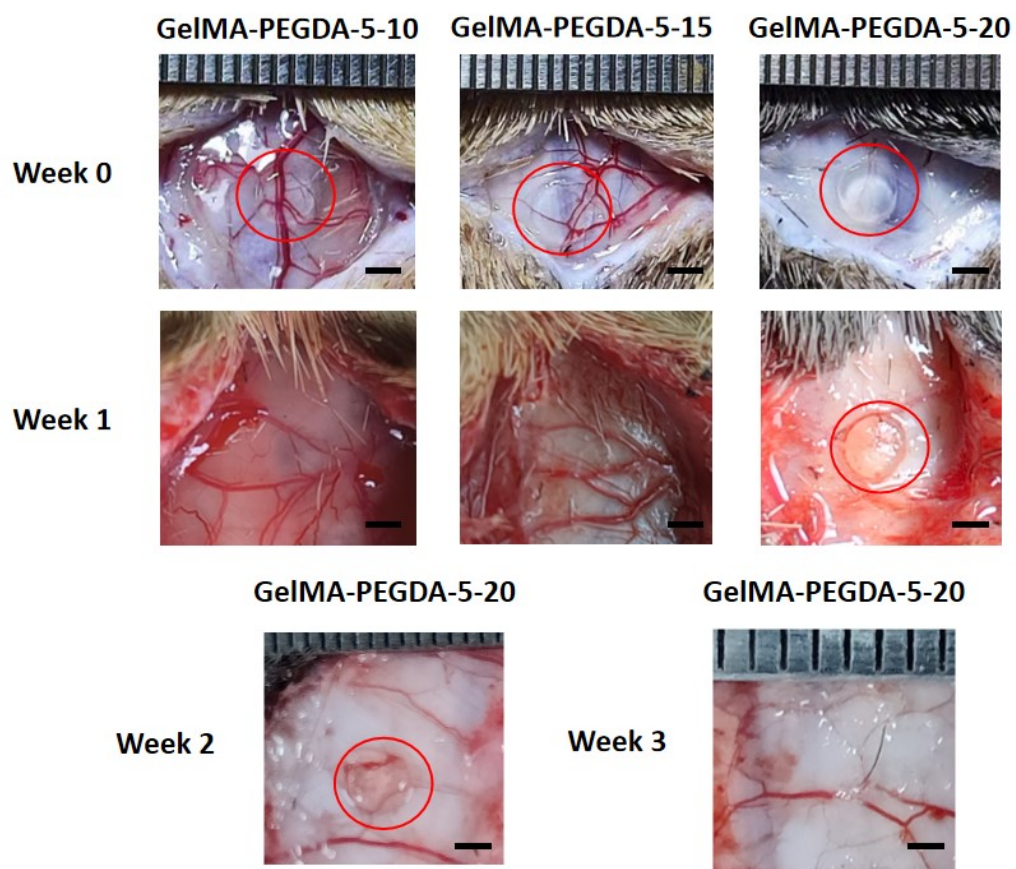

**Fig. S4** Degradation behavior of GelMA-PEGDA hydrogels in guinea pig subcutaneous tissue. Bar: 1 mm.

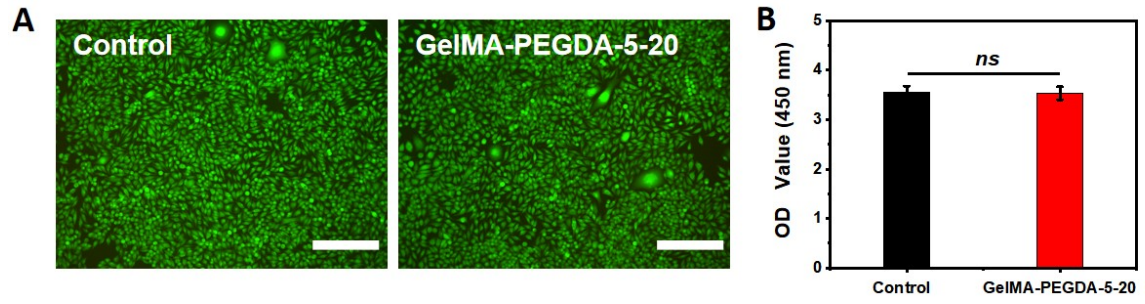

**Fig. S5** Cytotoxicity assay of GelMA-PEGDA-5-20 hydrogel. (A) Live/dead images of fibroblasts treated with hydrogel and the control group. Scale bar: 250  $\mu\text{m}$ . (B) OD values of CCK-8 assay of the control group and the hydrogel group.

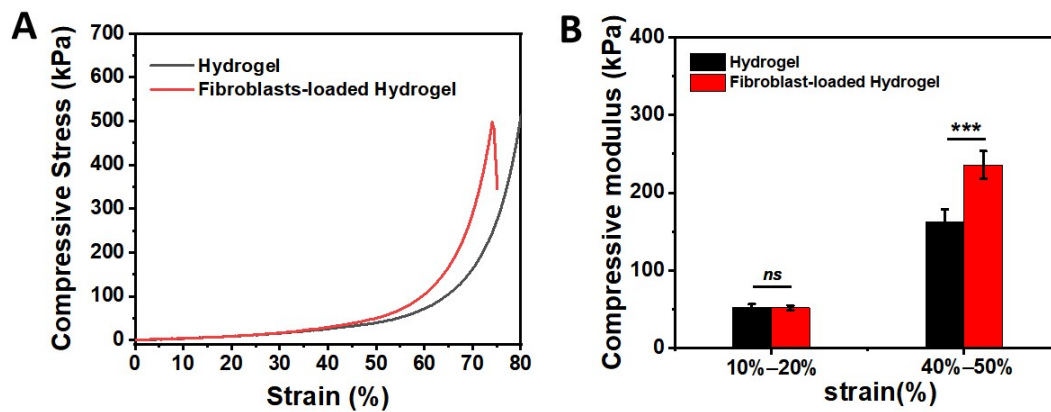

**Fig. S6** (A) Compressive stress-strain curves and (B) compressive modulus of GelMA-PEGDA-5-20 hydrogel and fibroblasts-loaded GelMA-PEGDA-5-20 hydrogel after 24-hours swelling in PBS at 37 °C.

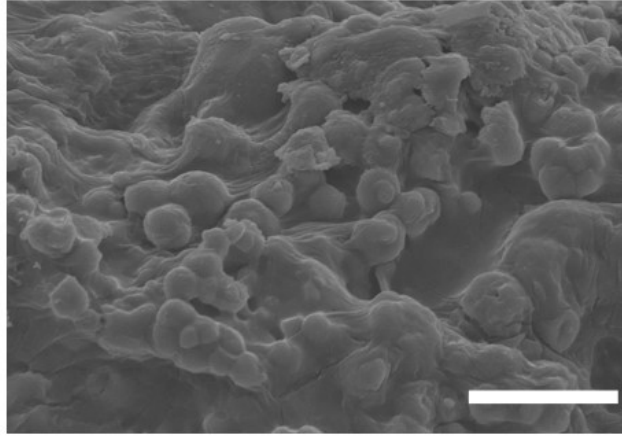

**Fig. S7** SEM image of fibroblasts-loaded GelMA-PEGDA-5-20 hydrogel on Day 7.

Scale bar: 10  $\mu\text{m}$ .



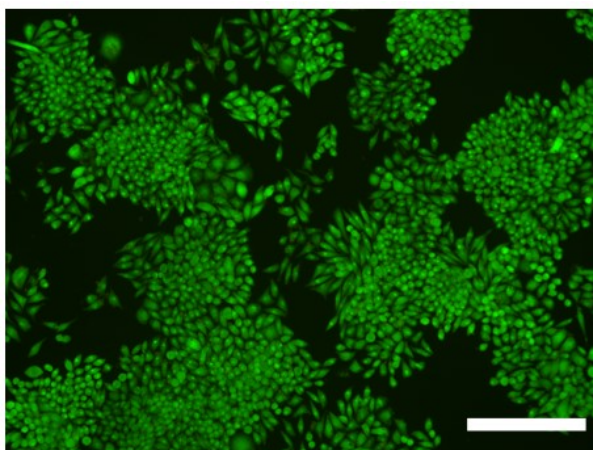

**Fig. S8** Live/dead images of new cell colonies formed by proliferation of scattered fibroblasts from the fibroblasts-loaded GelMA-PEGDA-5-20 hydrogel on Day 7. Scale bar: 250  $\mu\text{m}$ .

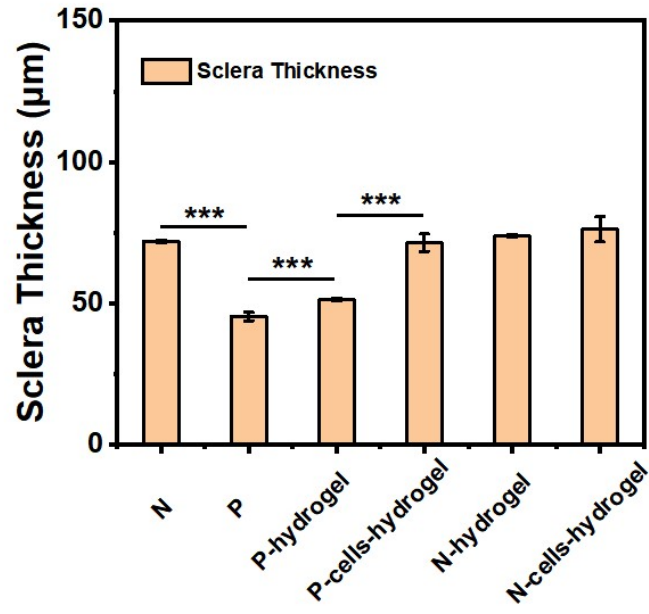

**Fig. S9** Scleral thickness of guinea pigs in each group on week 2 calculated by hematoxylin and eosin staining.
